# Supplementary material
Source: MDPI journal article supplement (https://www.mdpi.com/2410-3896/7/1/4)
Supplement: s1 [file s1]

# Magnetic Compton scattering study of Li-rich battery materials

Kosuke Suzuki <sup>1,\*</sup>, Yuji Otsuka <sup>1</sup>, Kazushi Hoshi <sup>1</sup>, Hiroshi Sakurai <sup>1</sup>, Naruki Tsuji <sup>2</sup>, Kentaro Yamamoto <sup>3</sup>, Naoaki Yabuuchi <sup>4</sup>, Hasnain Hafiz <sup>5</sup>, Yuki Orikasa <sup>6</sup>, Yoshiharu Uchimoto <sup>3</sup>, Yoshiharu Sakurai <sup>2</sup>, Venkatasubramanian Viswanathan <sup>5</sup>, Arun Bansil <sup>7</sup>, and Bernardo Barbiellini <sup>8,7</sup>

<sup>1</sup> Faculty of Science and Technology, Gunma University, Kiryu, Gunma, Japan;  
kosuzuki@gunma.ac.jp (K.S.), t201d016@gunma-u.ac.jp (Y.O.), hoshi@gunma-u.ac.jp (H.K),  
sakuraih@gunma-u.ac.jp (H.S.)

<sup>2</sup> Japan Synchrotron Radiation Research Institute (JASRI), Sayo, Hyogo, Japan;  
ntsuji@spring8.or.jp (N.T.), sakurai@spring8.or.jp (Y.S.)

<sup>3</sup> Graduate School of Human and Environmental Studies, Kyoto University, Sakyo-ku, Kyoto, Japan; yamamoto.kentaro.4e@kyoto-u.ac.jp (K.Y.), uchimoto.yoshiharu.2n@kyoto-u.ac.jp (Y.U.)

<sup>4</sup> Department of Chemistry and Life Science, Yokohama National University, Yokohama, Kanagawa, Japan; yabuuchi-naoaki-pw@ynu.ac.jp (N.Y.)

<sup>5</sup> Department of Mechanical Engineering, Carnegie Mellon University, Pittsburgh, PA, USA;  
hafiz.h@northeastern.edu (H.H.), venkatv@andrew.cmu.edu (V.V.)

<sup>6</sup> Department of Applied Chemistry, Ritsumeikan University, Kusatsu, shiga, Japan;  
orikasa@fc.ritsumei.ac.jp (Y.O.)

<sup>7</sup> Department of Physics, Northeastern University, Boston, MA, USA; ar.bansil@northeastern.edu (A.B.)

<sup>8</sup> Department of Physics, School of Engineering Science, LUT University, Lappeenranta, Finland;  
Bernardo.Barbiellini@lut.fi (B.B.)

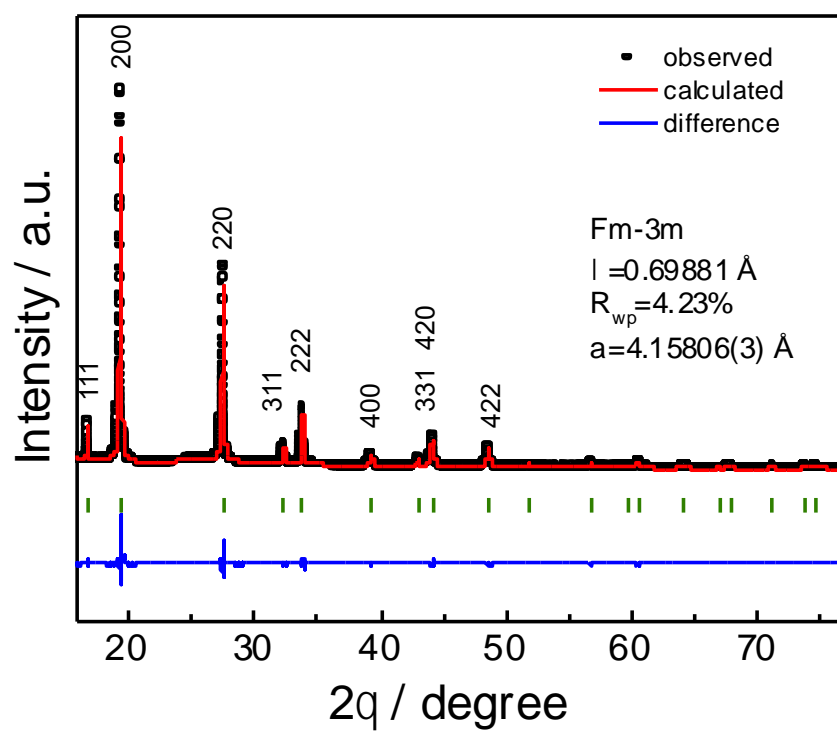

**Figure S1.** X-ray diffraction pattern of prepared  $\text{Li}_{1.2}\text{Ti}_{0.4}\text{Mn}_{0.4}\text{O}_2$ .

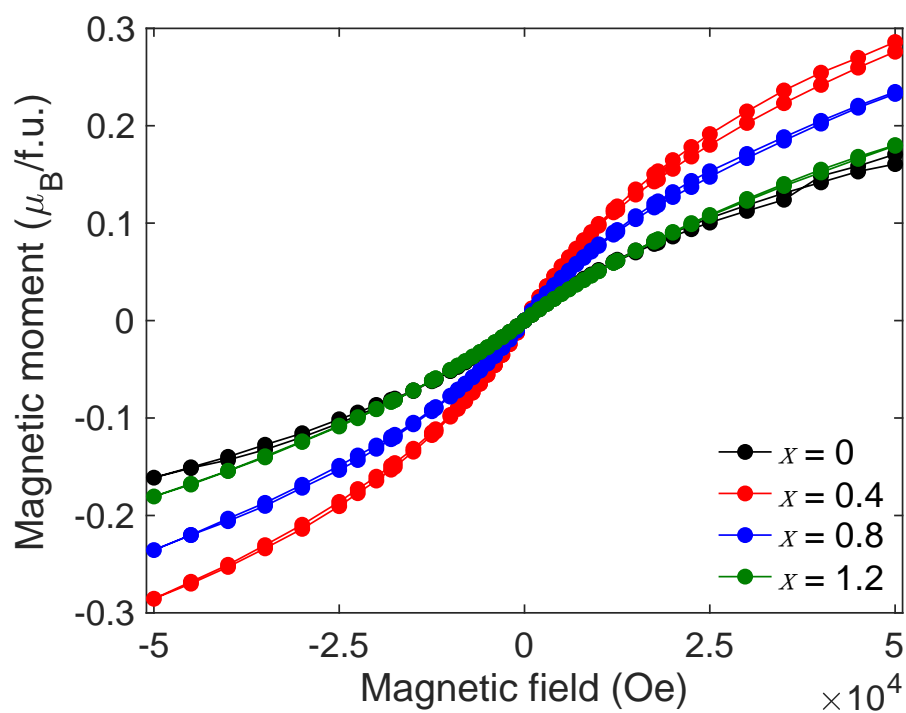

**Figure S2.** Hysteresis curves for various lithium concentrations ( $x$ ) obtained by a SQUID magnetometer. Measurements were performed at approximately 10K.
